# Supplementary material for: Determination of mercury(ii) in water at sub-nanomolar levels by laser ablation-ICPMS analysis of screen printed electrodes used as a portable voltammetric preconcentration system
Source: Royal Society of Chemistry journal article supplement (doi:10.1039/c7an00049a), 2017-01-01
Supplement: c7an00049a1.pdf [file c7an00049a1.pdf]

**Electronic Supplementary Information**

**Determination of Mercury (II) in water at sub-nanomolar levels by  
Laser Ablation – ICPMS analysis of screen printed electrodes used as  
portable voltammetric preconcentration system**

*Zuriñe Abrego,<sup>a</sup> Nora Unceta,<sup>a</sup> Alicia Sánchez,<sup>b</sup> Alberto Gómez-Caballero,<sup>a</sup> Luis Maria  
Berrio-Ochoa,<sup>c</sup> M. Aranzazu Goicolea,<sup>a</sup> Ramón J. Barrio<sup>\*,a</sup>*

<sup>a</sup> Department of Analytical Chemistry, Faculty of Pharmacy, University of the Basque Country,  
UPV/EHU, 01006 Vitoria-Gasteiz, Spain

<sup>c</sup> Departament of Graphic Design and Engineering Projects, EUI, University of the Basque Country,  
UPV/EHU, 01006 Vitoria-Gasteiz, Spain

<sup>b</sup> Alava Central Service of Analysis, SGiker, Lascaray Research Center, University of the Basque  
Country, UPV/EHU, Vitoria-Gasteiz, Spain

\*Corresponding author. Tel: +34945013055, fax: +34945014351

E-mail address: r.barrio@ehu.es

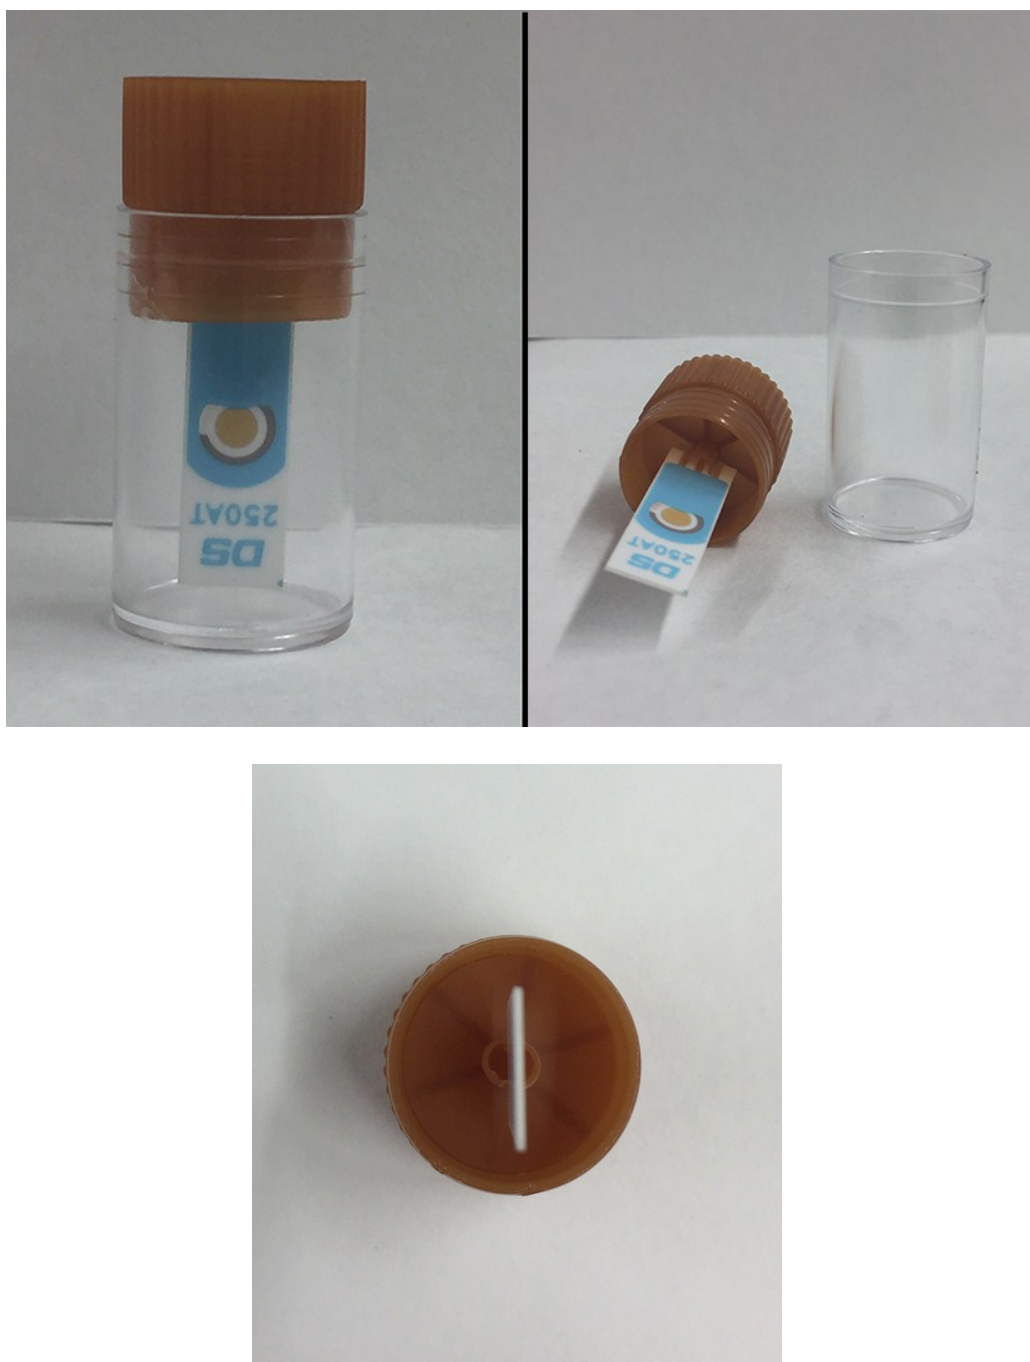

**Figure S1.** Transport device of the SPGE to the laboratory, based on a plastic vial with a fitting cap

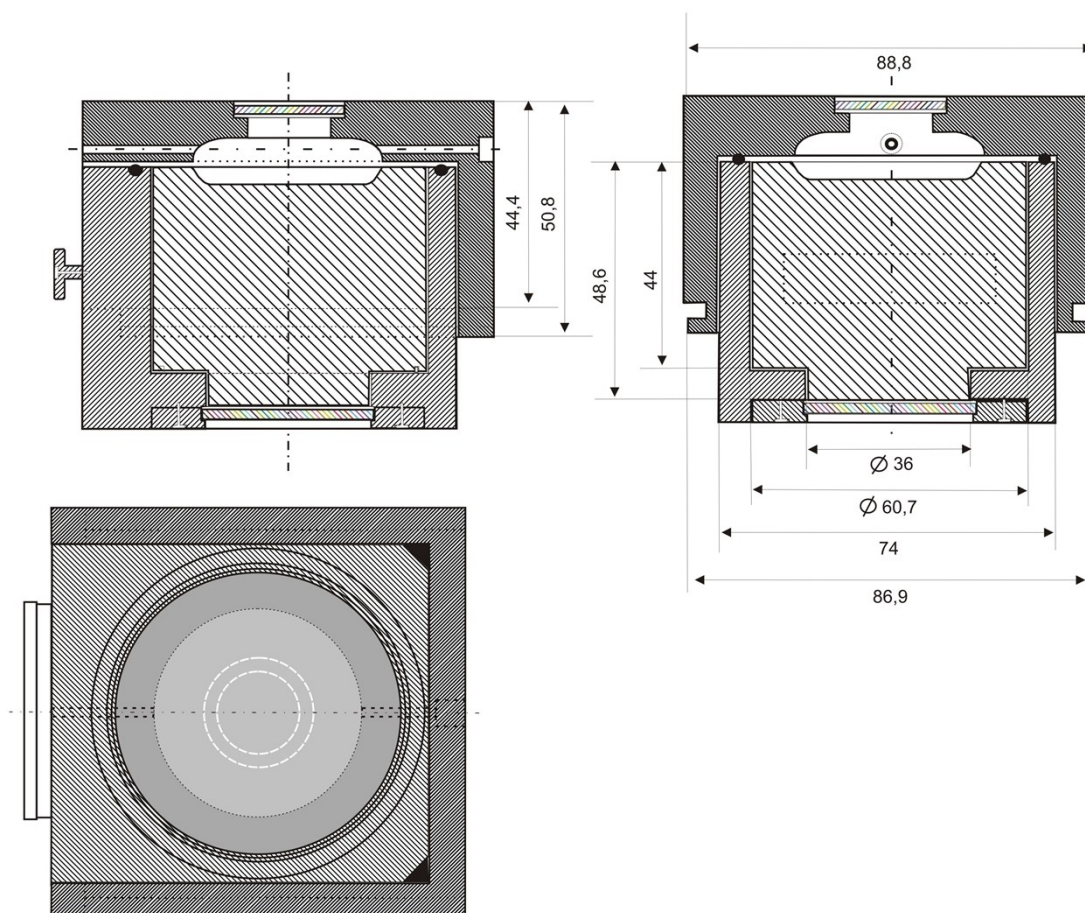

**Figure S2.** Details concerning ablation sample chamber construction and its dimensions.
